# Supplementary material
Source: publisher figshare collection journal article supplement (https://sage.figshare.com/ndownloader/files/18743594)
Supplement: Supplementary file 1 [file 18743594]

**Appendix Table A1. Patients with Minimum 2-Year Follow-Up – Univariate Analysis and Multivariate\* Cox Proportional Hazards Regression**

| Demographic                      | <b><u>n = 3,395</u></b> |                    | P-Value      |
|----------------------------------|-------------------------|--------------------|--------------|
|                                  | Patellar Tendon         | Hamstring Tendon   |              |
| Overall Sample                   | 639                     | 2,756              |              |
| Revision ACL Reconstruction      |                         |                    |              |
| n                                | 18                      | 122                | 0.065        |
| %                                | 2.8%                    | 4.4%               |              |
| Hazard Ratio* (95% CI)           | Reference               | 2.09 (1.25 - 3.48) | <b>0.005</b> |
| Contralateral ACL Reconstruction |                         |                    |              |
| n                                | 21                      | 41                 | 0.002        |
| %                                | 3.3%                    | 1.5%               |              |
| Hazard Ratio* (95% CI)           | 1.91 (1.08 - 3.39)      | Reference          | <b>0.027</b> |

\*Adjusted Cox regression analysis was performed with the following factors entered into the model: Age, sex, time to surgery, activity at time of injury, medial and lateral meniscal treatment and pre-operative Marx score
